# Supplementary material for: Assessing Grapevine Water Status by Integrating Vine Transpiration, Leaf Gas Exchanges, Chlorophyll Fluorescence and Sap Flow Measurements
Source: MDPI journal article supplement (doi:10.3390/agronomy13020464), 2023-02-04
Supplement: s1 [file s1]

## SUPPLEMENTARY MATERIAL

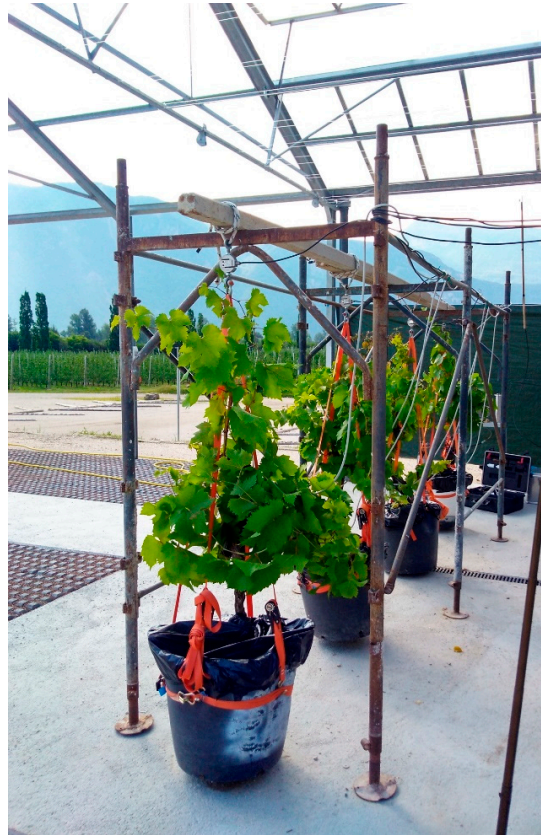

**Figure S1.** The experimental set up with the load cells system

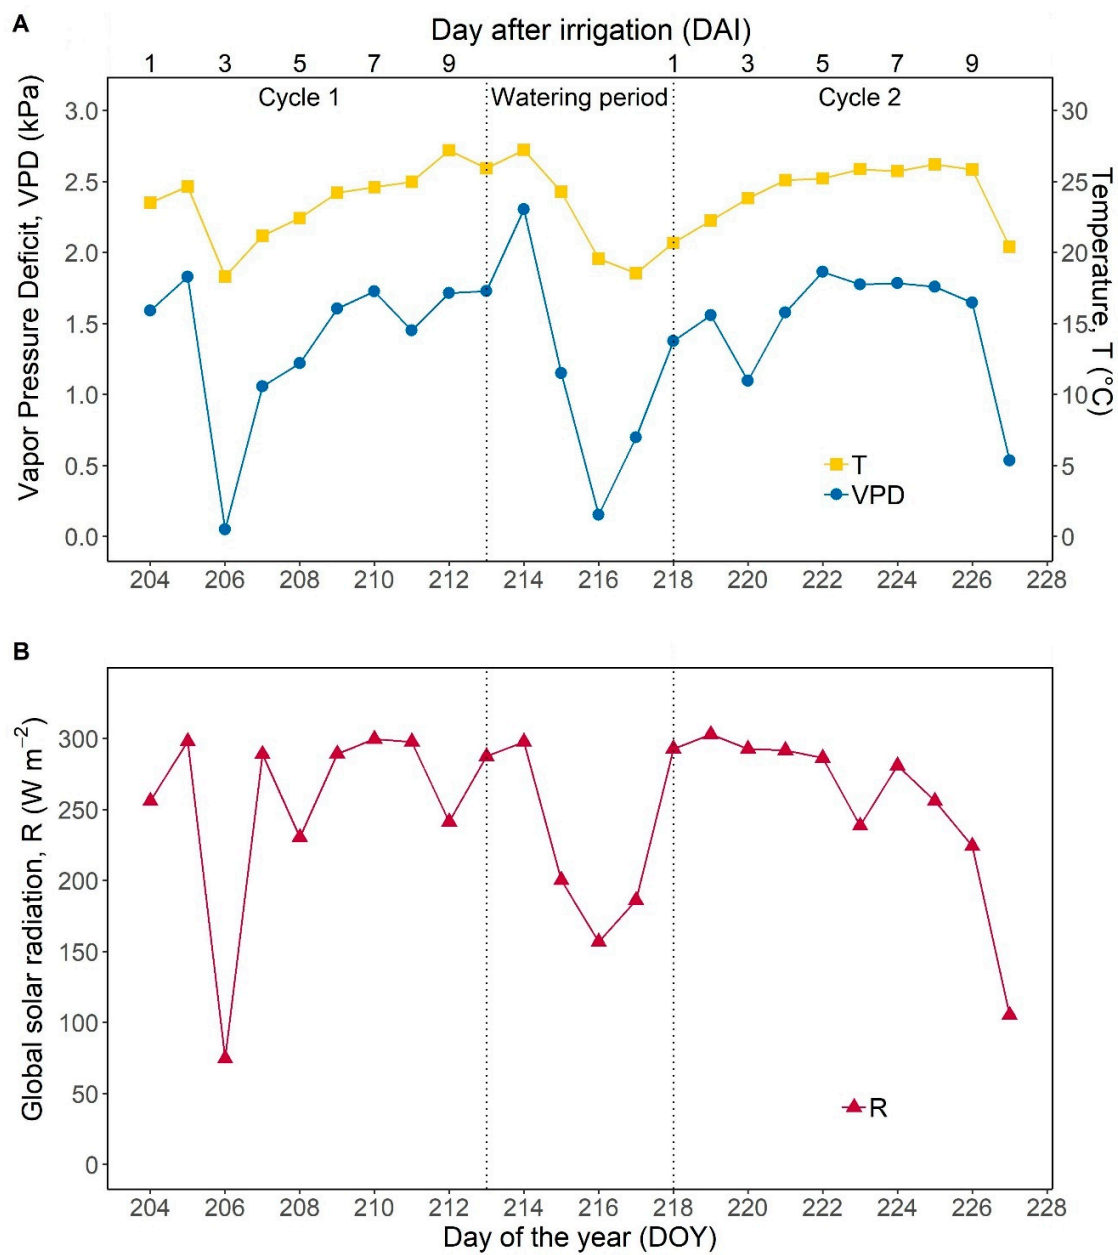

**Figure S2.** (A) Daily mean VPD (kPa, ●) on the first y-axis and daily mean temperature ( $^{\circ}\text{C}$ , ■) on the second y axis and (B) daily mean  $R$  ( $\text{W m}^{-2}$ , ▲) during the study period.

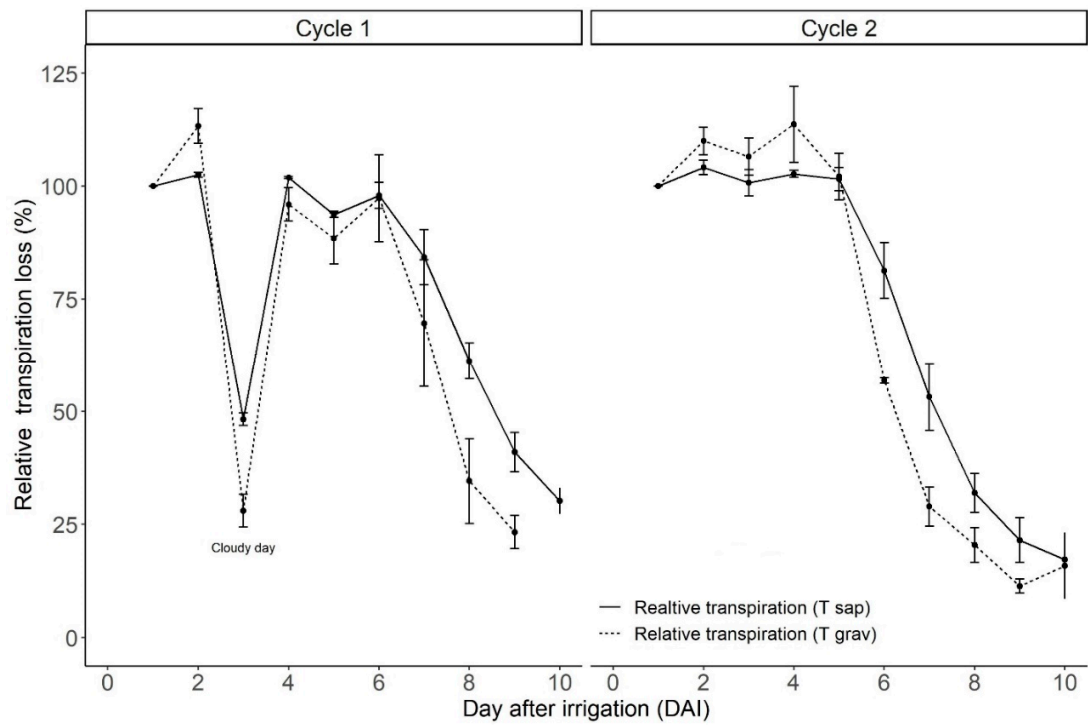

**Figure S3.** Relative transpiration loss (the daily variation of transpiration referring to the initial situation at DAI 1). Each point represents the mean value of  $T_{sap}$  and  $T_{grav}$  from 3 vines in each DAI. Bars represent standard errors.

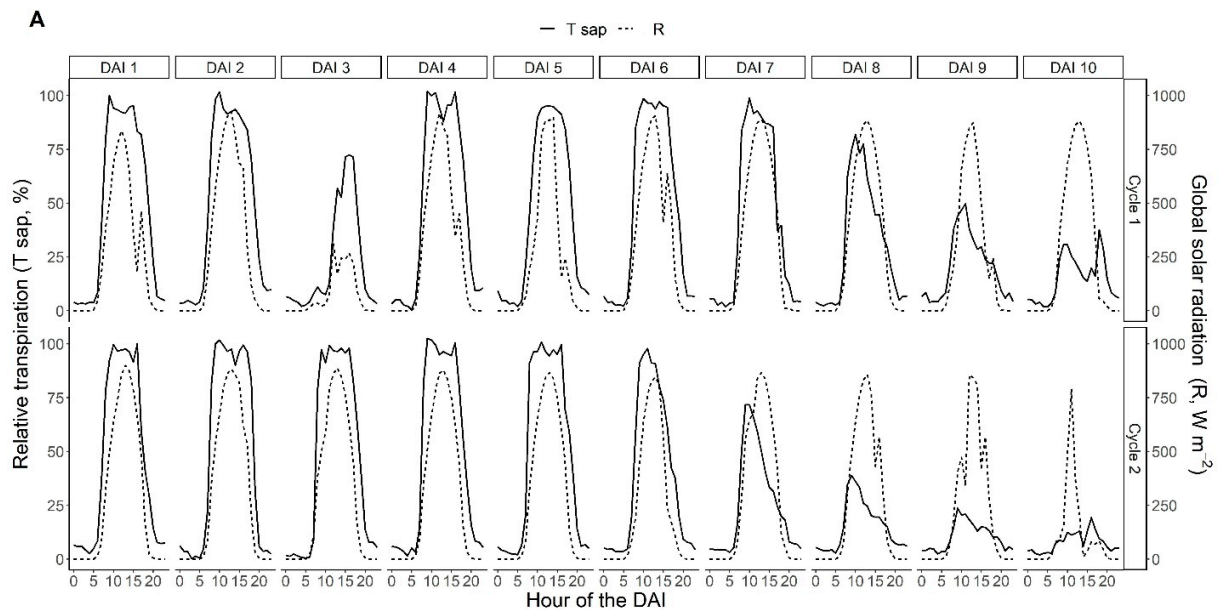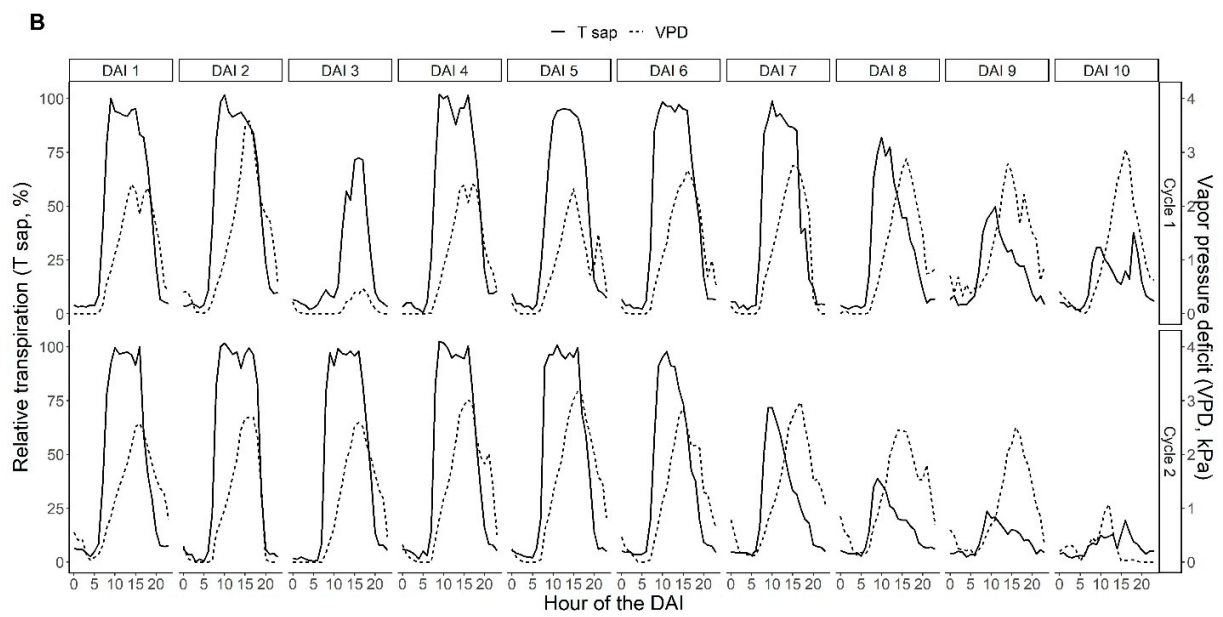

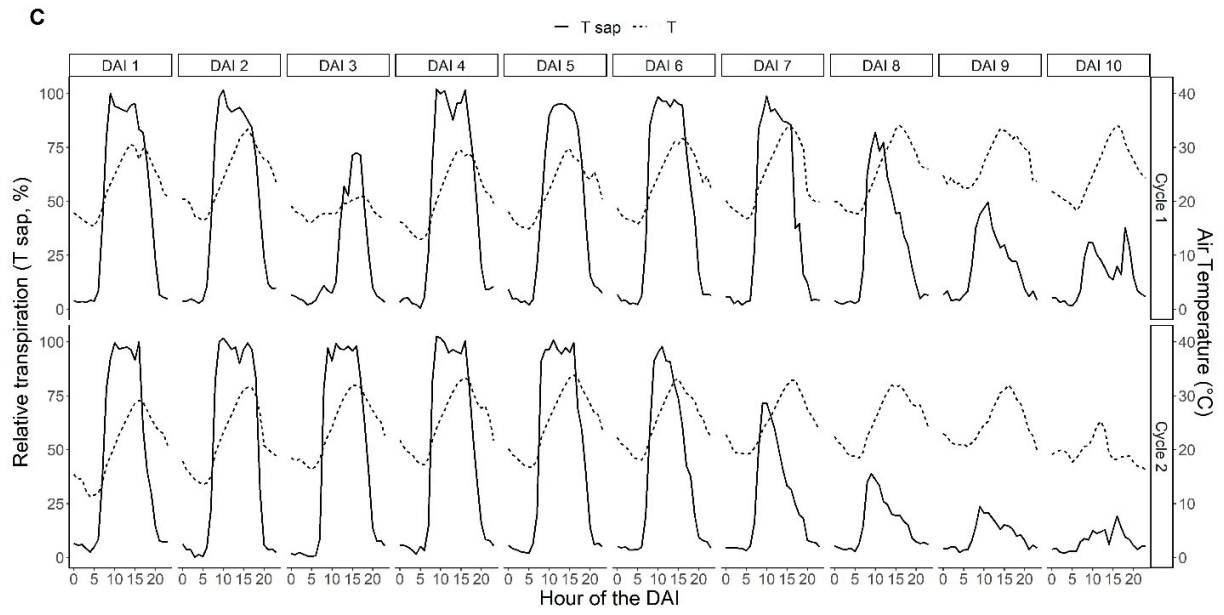

**Figure S4.** Diurnal patterns of relative transpiration rate ( $T_{sap}$ ) and the environmental conditions: (A)  $R$  ( $W\ m^{-2}$ ), (B) VPD (kPa) and (C)  $T$  ( $^{\circ}C$ ) during both drought cycles.
